# Supplementary material for: Synthesis of NiO/Y2O3/ZrO2 Catalysts Prepared by One-Step Polymerization Method and Their Use in the Syngas Production from Methane
Source: Hindawi journal article supplement (doi:10.1155/2018/9487486), 2018-08-23
Supplement: f1 [file 9487486.f1.docx]

**Supporting Information**

Electronic supplementary material

**Synthesis of NiO/Y2O3/ZrO2 catalysts prepared by one-step polymerization method and their use in the Syngas production from methane.**

Yvan J.O. Asencios*1 and Elisabete M. Assaf2

*1Instituto do Mar, Universidade Federal de São Paulo, 11030-100, Santos- SP, Brasil.*

*2Instituto de Química de São Carlos, Universidade de São Paulo, 13560-970, São Carlos-SP, Brasil.*

*Corresponding author: [*yvan.jesus@unifesp.br*](mailto:yvan.jesus@unifesp.br)

**

**

**Fig. S1.** XRD patterns of the fresh 20YZ support and pure ZrO2 (NiO, Niº, T= tetragonal ZrO2, M=monoclinical ZrO2). (in the 2θ = 20 - 40º range, speed 2º.min -1 using Cu-K α radiation (λ = 1.5406Å)


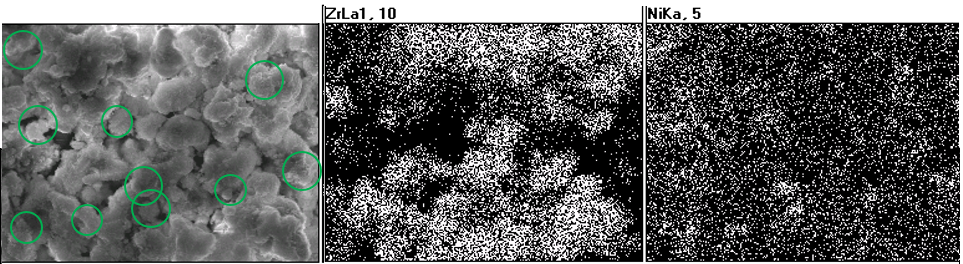


**Fig. S2.** EDX mapping at the region of SEM image of Figure 4, Sample: 10Ni20YZ.


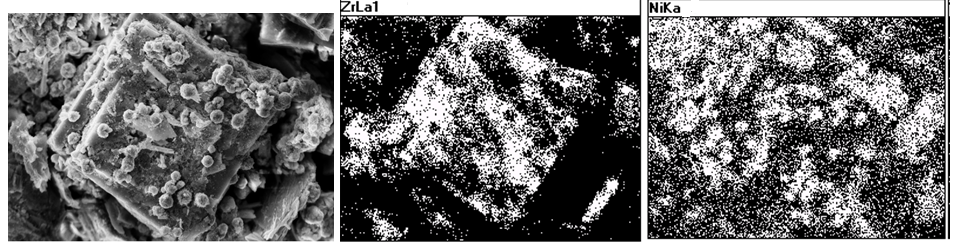


**Fig. S3.** EDX mapping at this region of SEM image of Figure 5, Sample: 20Ni20YZ.

**
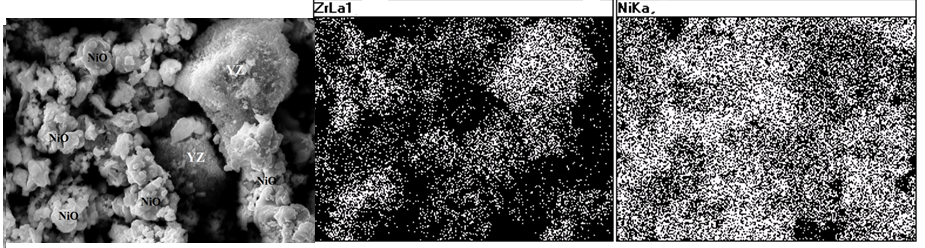
**

**Fig. S4.** EDX mapping at this region of SEM image of Figure 6, Sample: 40Ni20YZ.

**

**

**Fig. S5.** Conversion of CO2 results obtained during the catalytic tests in the oxidative-reform of methane at 750 ºC (molar ratio of reactants 1.5CH4:CO2:0.25O2; molar total flow: 107 mL.min-1).

**
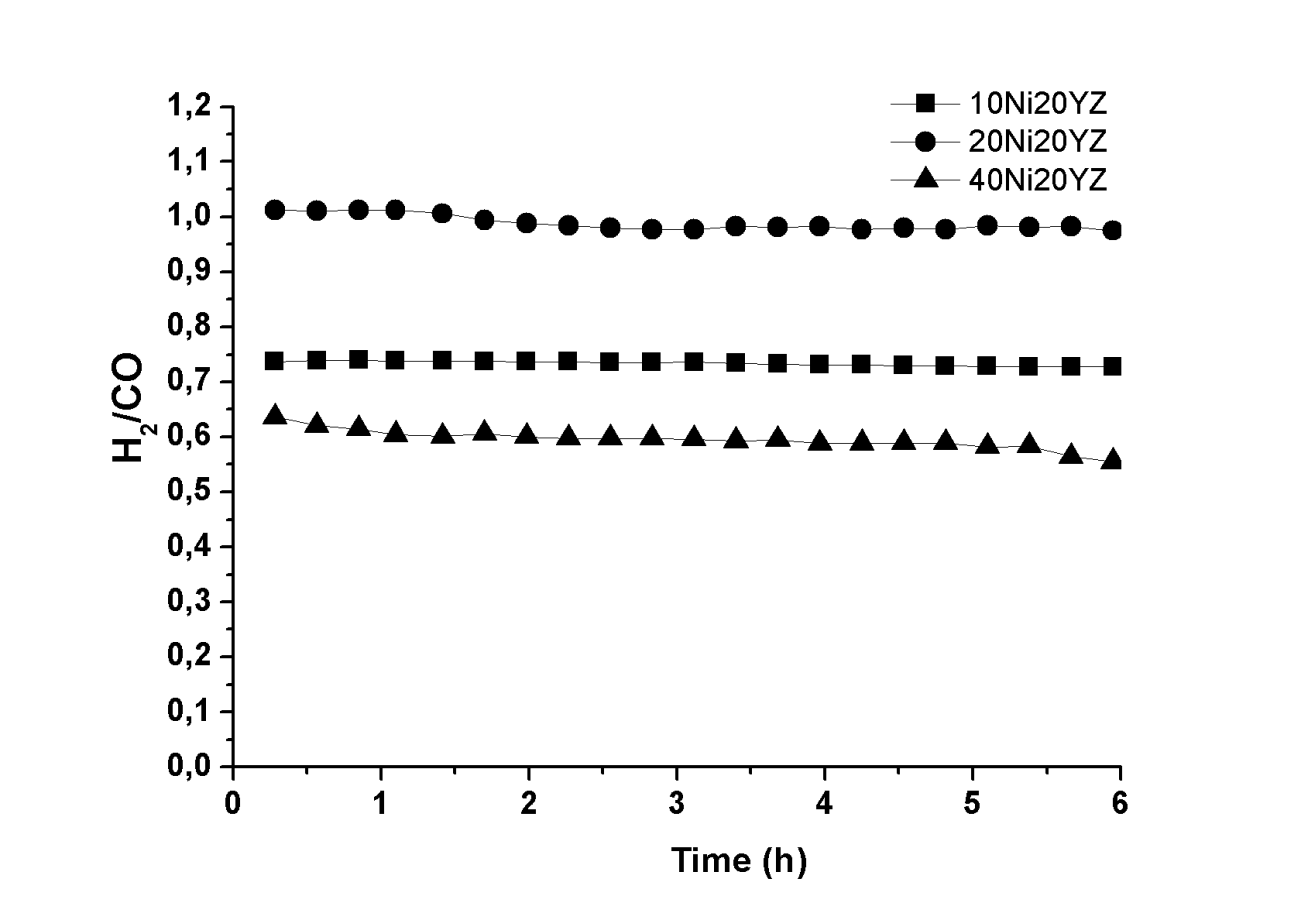
**

**Fig. S6.** H2/CO molar ratio in the reaction products obtained during the catalytic tests in the oxidative-reform of methane at 750 ºC (molar ratio of reactants 1.5CH4:CO2:0.25O2, molar total flow: 107 mL.min-1).





**Fig. S7.** Selectivity to Hydrogen (mol produced/mol of CH4 converted) obtained during the partial oxidation of methane over the catalysts at 750ºC (molar ratio of reactants: 2CH4:1O2, molar total flow of the inlet gases 107 mL.min-1).





**Fig. S8.** Selectivity to Carbon dioxide (mol produced/mol of CH4 converted) obtained during the partial oxidation of methane over the catalysts at 750ºC (molar ratio of reactants: 2CH4:1O2, molar total flow of the inlet gases 107 mL.min-1).

**
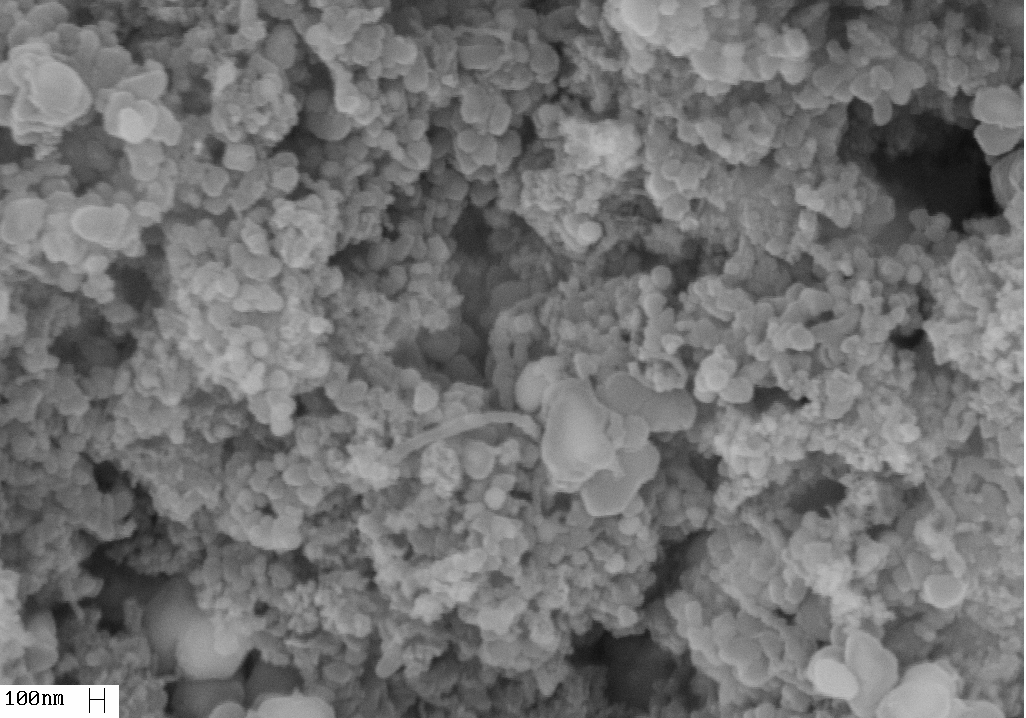
**

**Fig. S9.** SEM image of sample 20Ni20YZ after ORM reaction (x25 000)


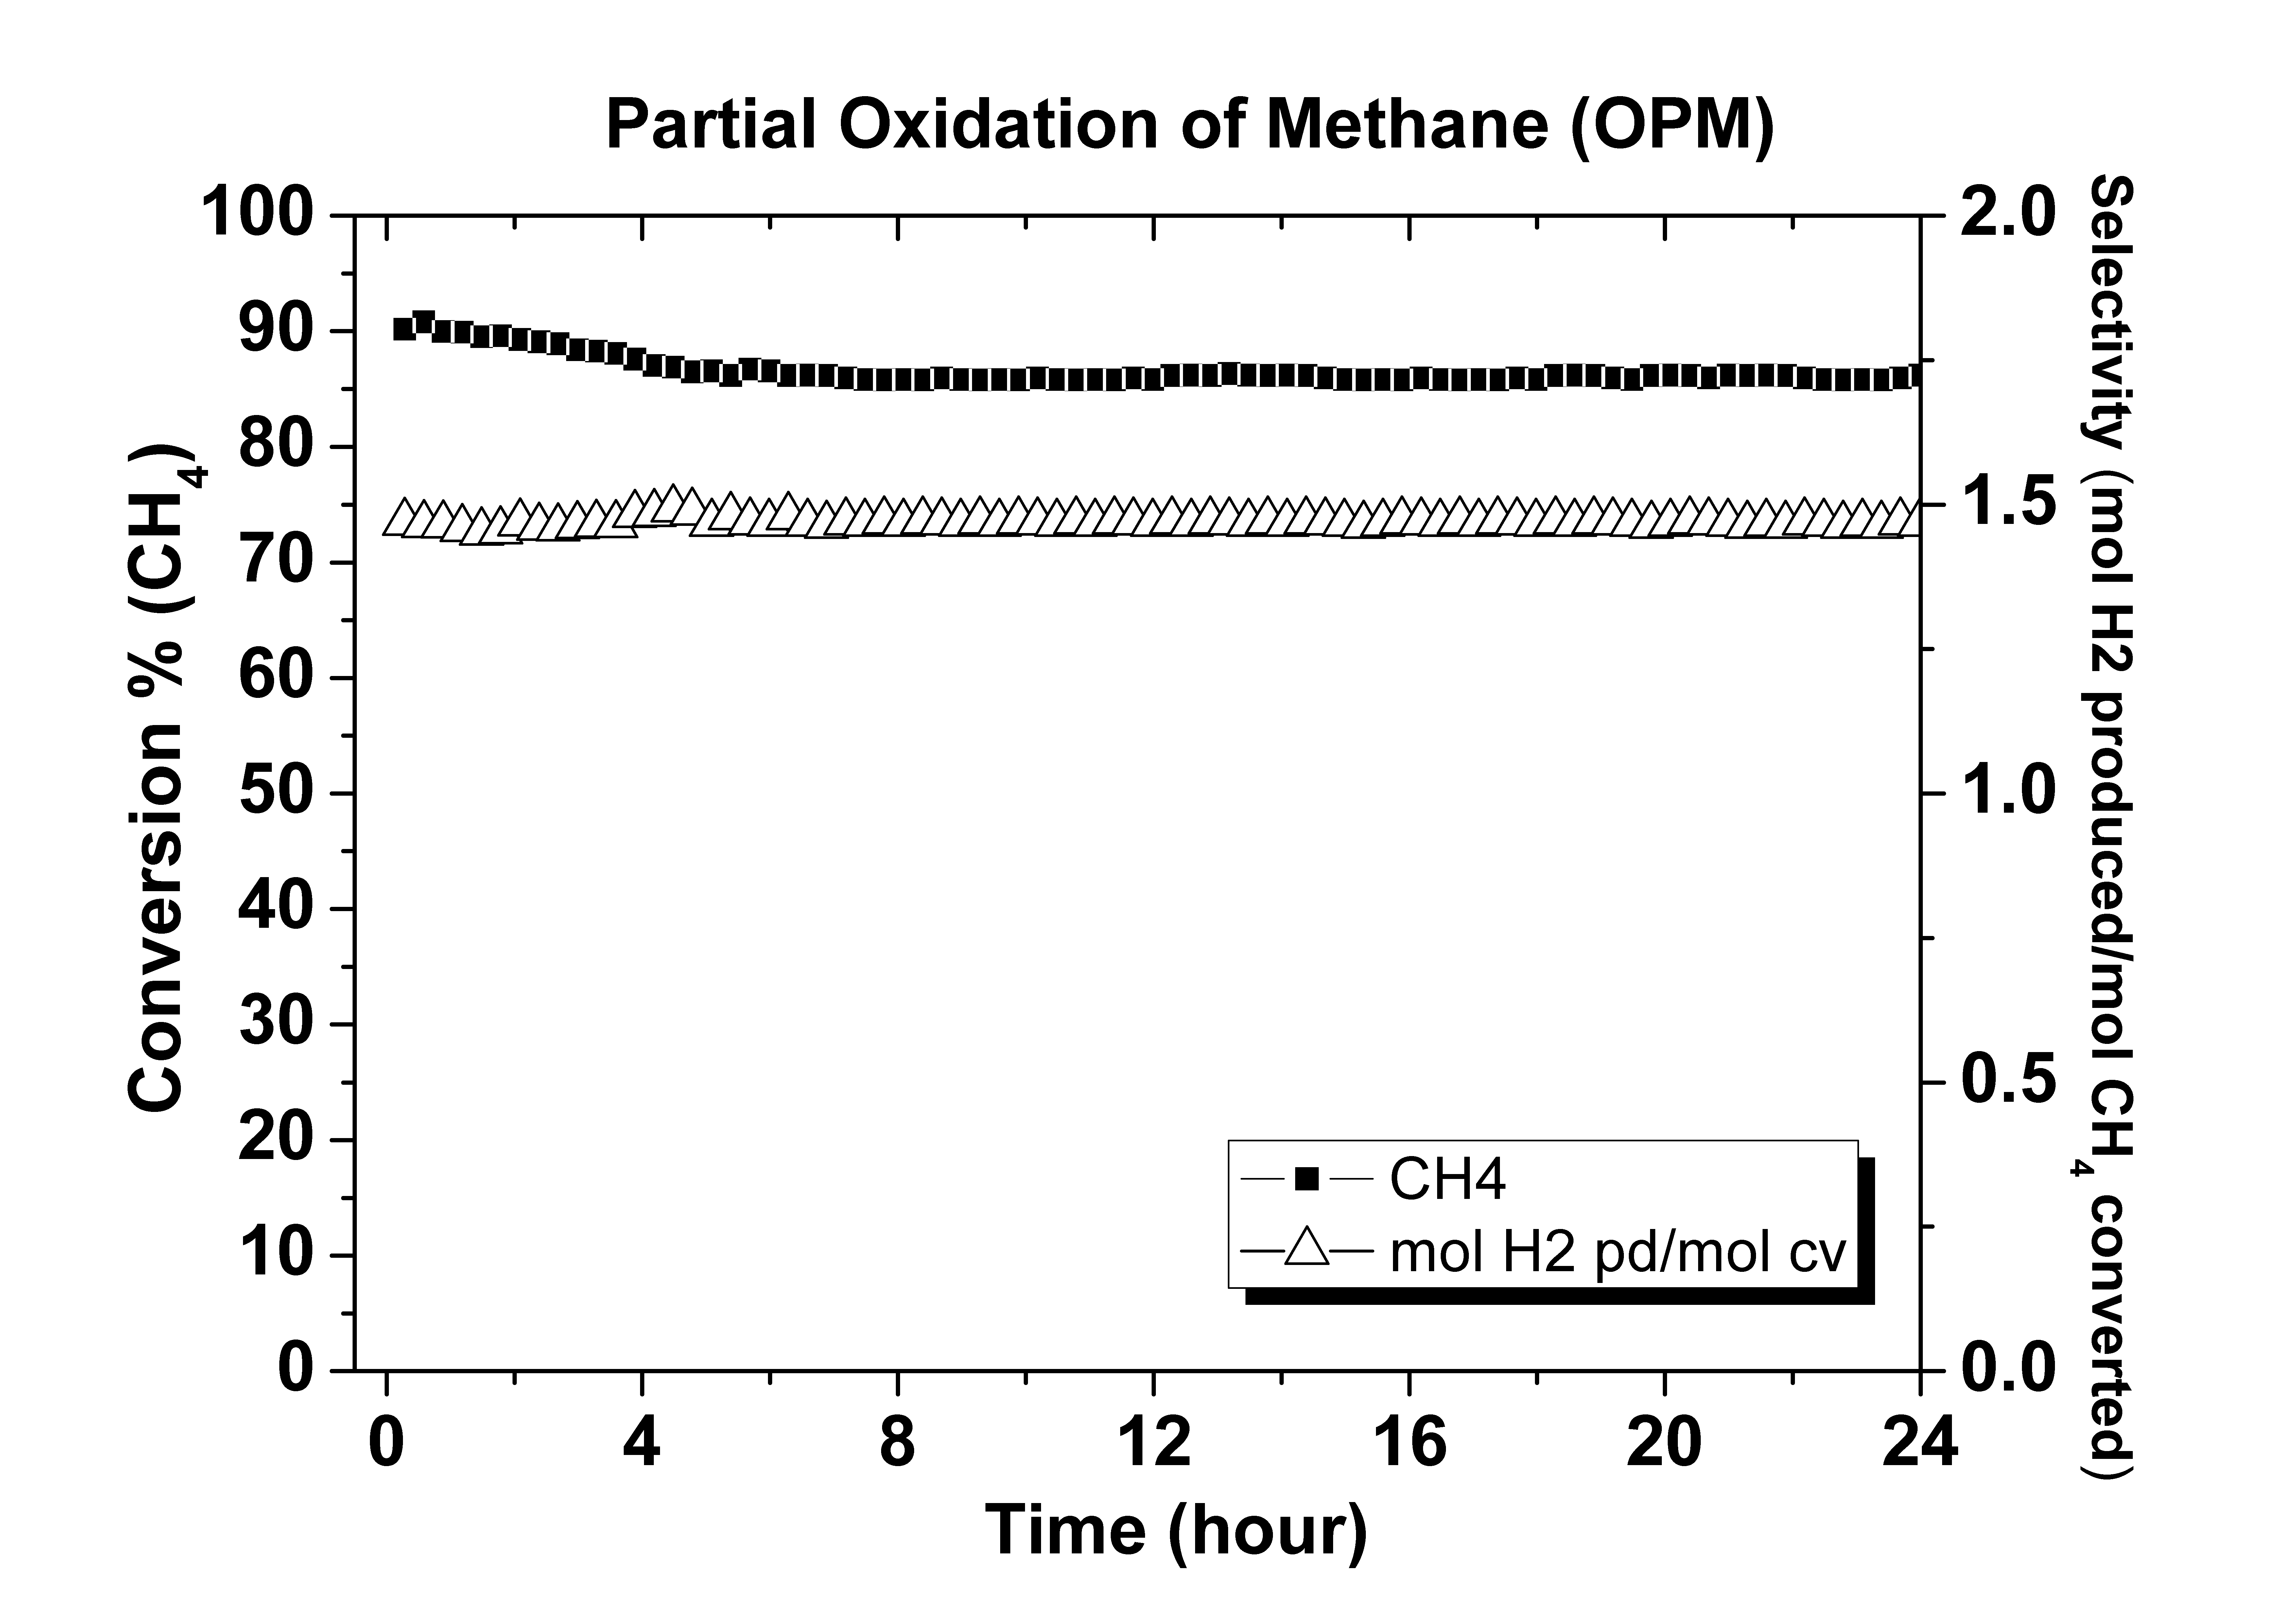


**Fig.S10.** Stability test of 20Ni20YZ catalysts for OPM reaction.


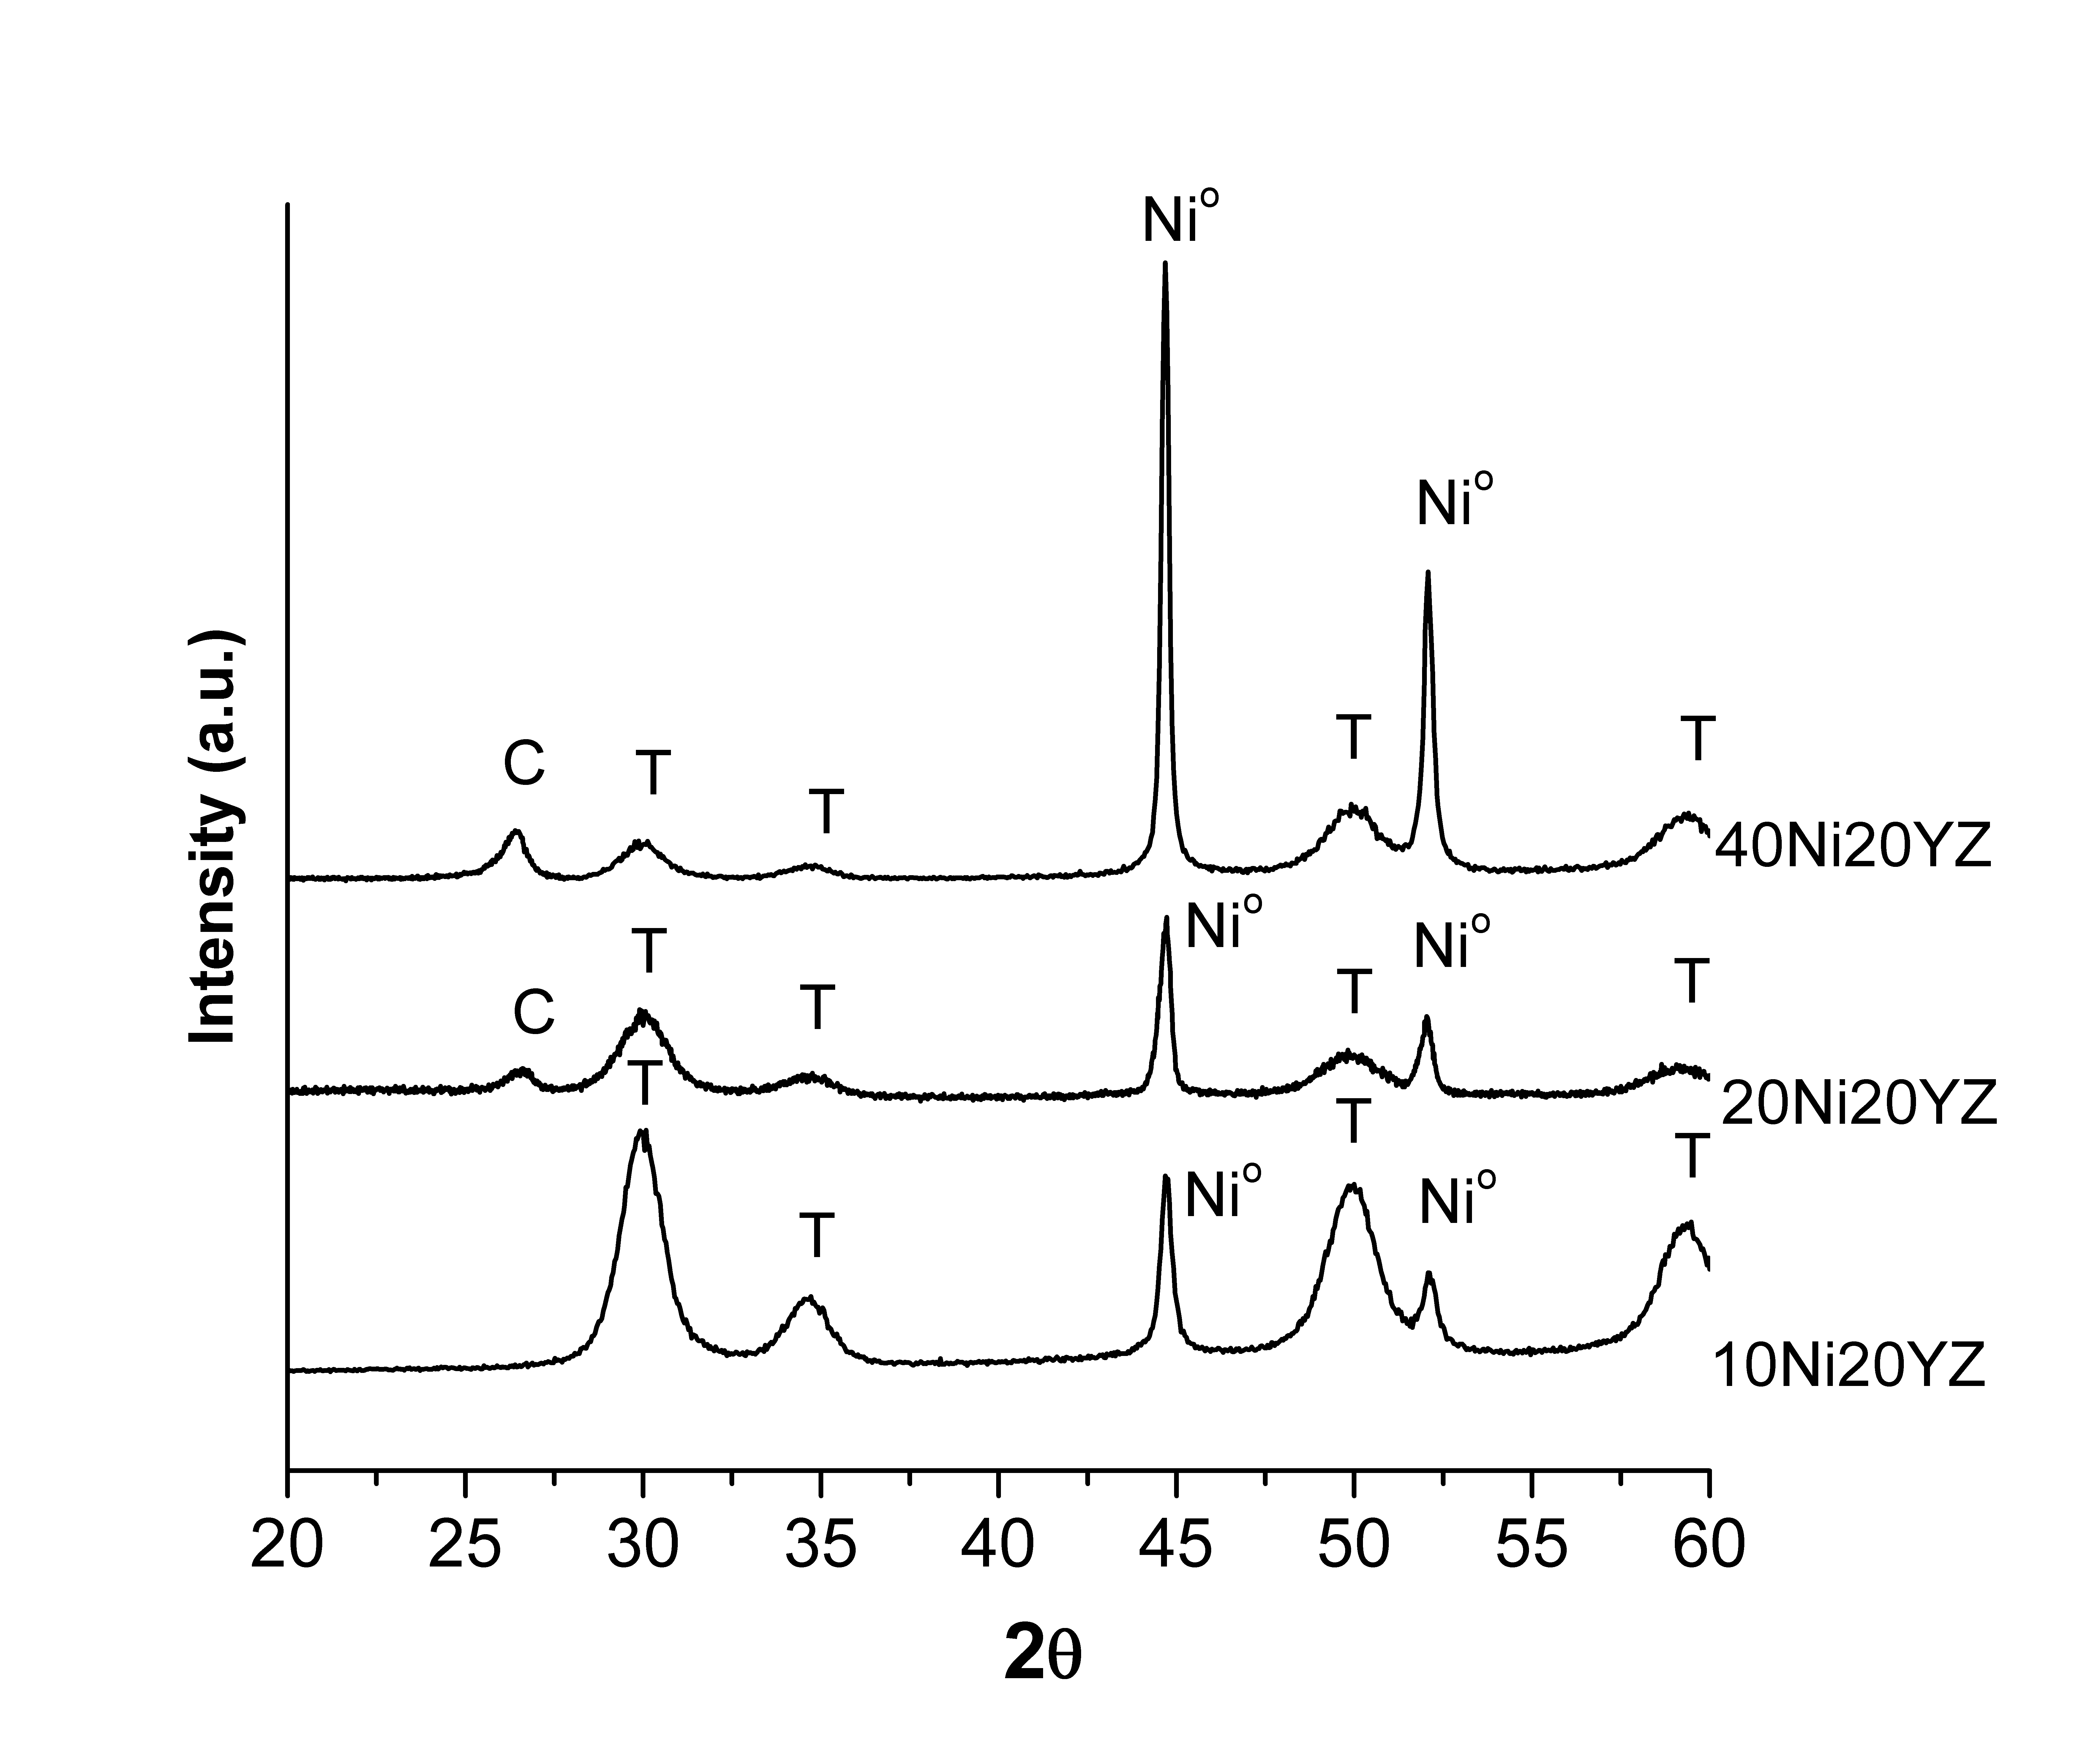


**Fig.S11.** XRD patterns for spent catalysts after POM reaction (C= graphitic carbon; T=Tetragonal ZrO2, Niº= metallic nickel).


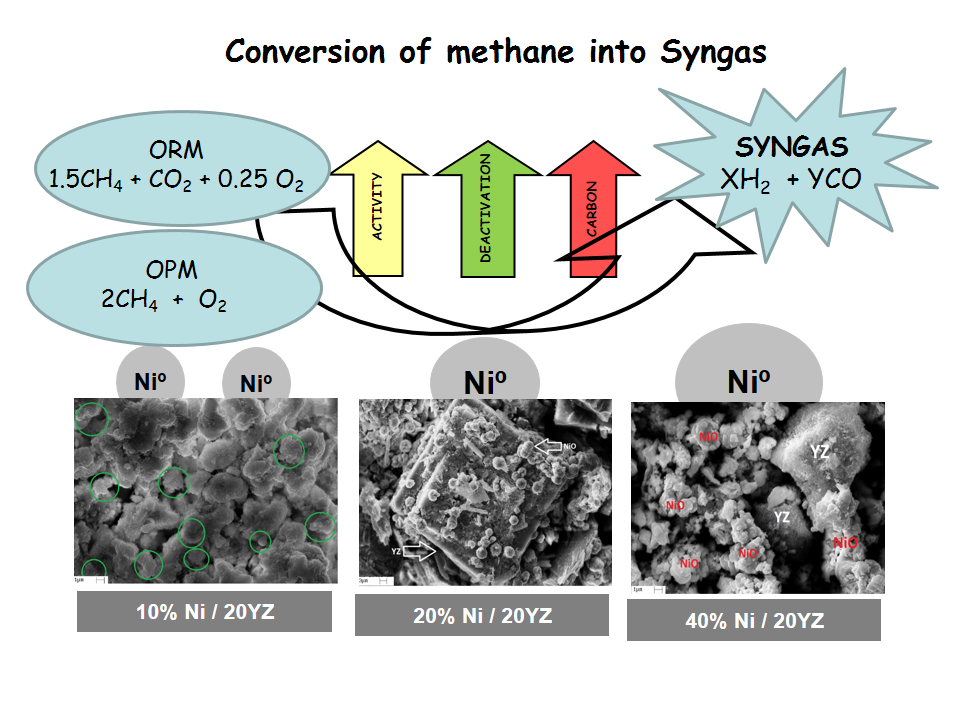


**Fig. S12.** Graphical abstract
